# Supplementary material
Source: publisher site journal article supplement (https://www.dovepress.com/article/428093)
Supplement: Supplementary file 1 [file get_supplementary_file.php]

Fig S1 **The serum concentrations of the pro-inflammatory factors IL-6, TNF-α, and IL-1β were measured by ELISA.** (mean ± SEM represents the resultant values, n = 3, *indicates compared to the control, p < 0.05).


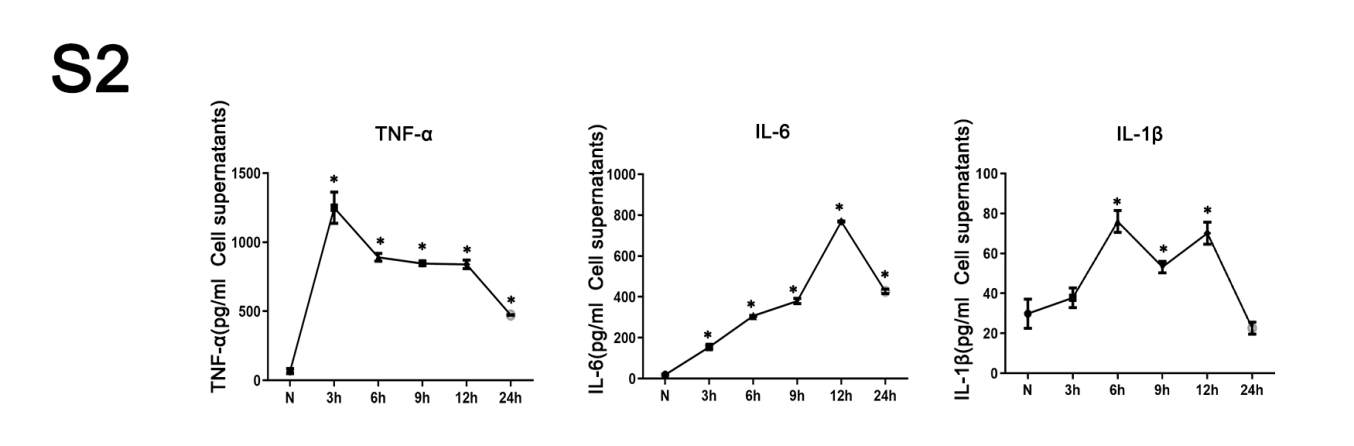


Fig S2 **ELISA was performed to detect the expression levels of inflammatory factors TNF-α, IL-6, and IL-1β in the cell culture supernatants of treated BV2 cells.** (mean ± SEM represents the resultant values, n = 3, *indicates compared to the control, p < 0.05).
